# Supplementary material for: Cationic imidazolium polymer monoliths for efficient solvent exchange, activation and fluorination on a continuous flow system
Source: Royal Society of Chemistry journal article supplement (doi:10.1039/c4ra04064c), 2014-01-01
Supplement: c4ra04064c1.pdf [file c4ra04064c1.pdf]

## Cationic imidazolium polymer monoliths for efficient solvent exchange, activation and fluorination on a continuous flow system

Rehana Ismail<sup>1,2</sup>, Jonathan Irribaren<sup>1,2</sup>, Muhammad Rashed Javed<sup>1,2</sup>, Ariella Machness<sup>1,2</sup>, R. Michael van Dam<sup>1,2</sup>, Pei Yuin Keng<sup>\*1,2</sup>

<sup>1</sup>Department of Molecular and Medical Pharmacology, <sup>2</sup>Crump Institute for Molecular Imaging, David Geffen School of Medicine, University of California, Los Angeles, Los Angeles, CA 90095, U.S.A.

### Supporting Information

#### Grafting of the glass channels of the microfluidic chip

Glass microfluidic chip was functionalized with methacryloxypropyltrimethoxysilane following a literature report.<sup>1</sup> The siloxly ether groups on the glass surface was first hydrolyzed to activate the glass surface by flowing NaOH (1 M, 1 mL) through an empty microfluidic chip at 1 ml/hr for 30 minutes. The microfluidic channel was then washed with water followed by HCl (1M, 1 mL) to neutralize the residual NaOH on the glass surface. The chip was finally washed with water (0.5 mL) and ethanol (0.5 mL). The activated microfluidic chip was dried in a vacuum oven overnight at 80°C. The channels were then incubated with the methacryloxypropyltrimethoxysilane (0.31 g, 1.3 mM, 0.3 mL) solution in acetone (3:7 v/v) in dark at room temperature overnight. The excess alkoxysilane reagent was washed with acetone and then air dried. The functionalized glass chip was kept in the dark at 2-8 °C.

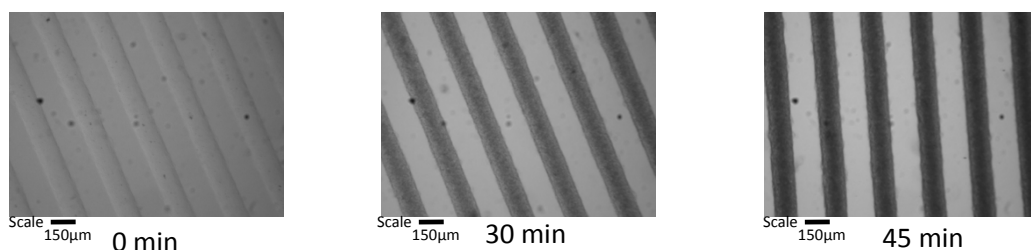

Fig. S-1: Optical images of the UV-polymerization of vinylbenzylchloride and divinylbenzene within the glass microfluidic chip at different times.

#### UV-photografting of the inner surface of ETFE tubing

Benzophenone (0.25 g, 1.4 mM) and EDMA (0.1 g; 0.5 mmoles; 95  $\mu$ L) was dissolved in 5 mL of acetone to achieve a final concentration of 0.1 M of ethylene dimethacrylate (EDMA) and 5% of benzophenone in acetone according to a modified literature report.<sup>2</sup> The reaction mixture was sonicated in a Schintillation vial for  $\sim$  5 minutes. The degassed mixture was immediately charged into a 1/16 inch OD ETFE (ID 400 $\mu$ m) tubing using a syringe and capped. The tubing was placed inside the UV spectrolinker equipped with a 254 nm lamp at 504 mJ/m<sup>2</sup> for 20 min. After the initial photografting step, the tubing was washed with  $\sim$  1 mL of acetone and briefly dried with air.

The pore size of the vinylbenzyl chloride polymer monolith ranged from 1115  $\mu$ m to 0.0036  $\mu$ m with while the average pore size was 0.2490  $\mu$ m. The surface area of the polymer monolith was determined by BET analysis using nitrogen gas and found to be 1.047m<sup>2</sup>/g.

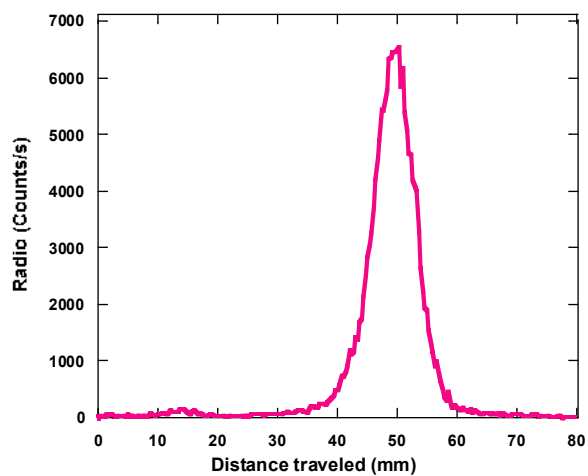

Fig. S-3: Representative radio-TLC of the 4-fluoroethylbenzoate. The TLC plate was developed in a mixture of hexane/ethyl acetate (1:1 v/v).

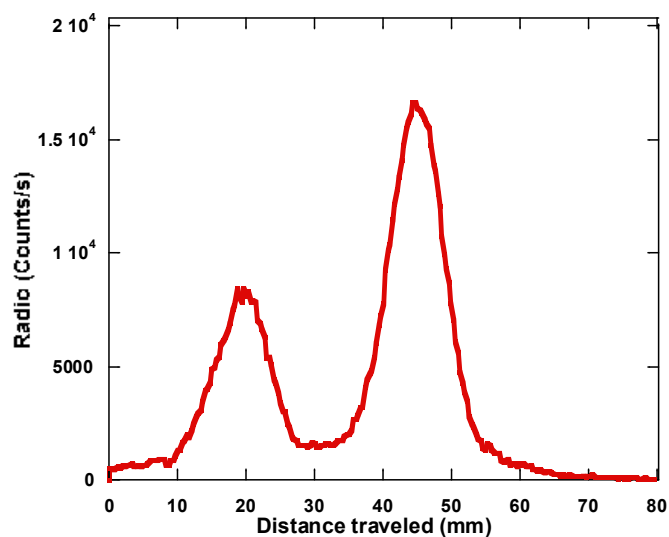

Fig. S-4: Representative radio-TLC of the [<sup>18</sup>F]fallypride. The TLC plate was developed in a mixture of methanol/ethyl acetate (1:1 v/v) and 1% of triethylamine.

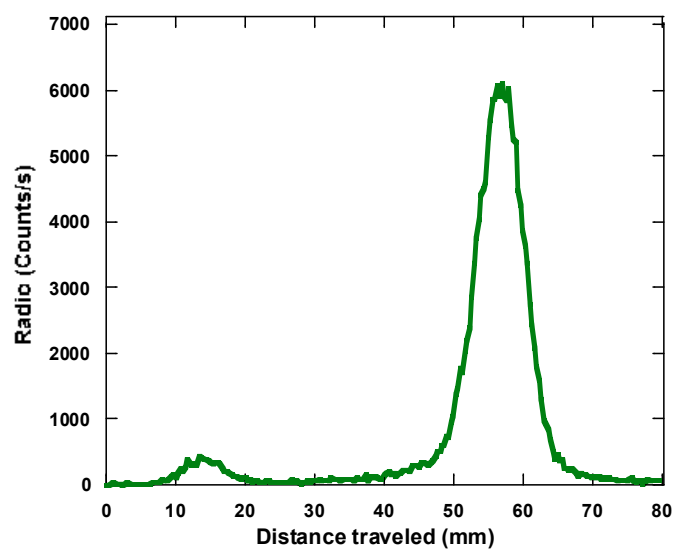

Fig. S-5: Representative radio-TLC of the protected [ $^{18}\text{F}$ ]FDG intermediate. The TLC plate was developed in a mixture of acetonitrile/water (95:5 v/v).

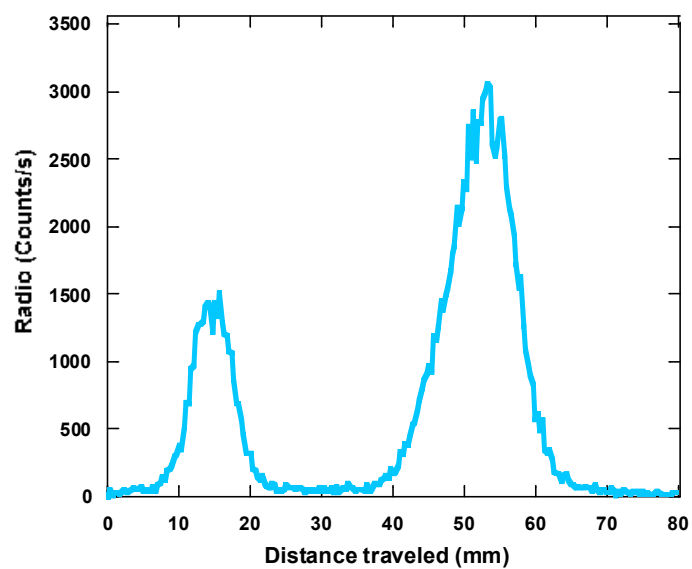

Fig. S-6: Representative radio-TLC of the protected [ $^{18}\text{F}$ ]FLT intermediate. The TLC plate was developed in a mixture of acetonitrile/water (95:5 v/v).

**References:**

1. J. Vidič, A. Podgornik, and A. Štrancar, *J. Chromatogr. A*, 2005, **1065**, 51–58.
2. D. Connolly and B. Paull, *J. Sep. Sci.*, 2009, **32**, 2653–2658.
